# Supplementary material for: Psychometric properties of the Russian version of the Pediatric Daytime Sleepiness Scale (PDSS)
Source: PubMed Central journal article supplement (PMC6661285; doi:10.1016/j.heliyon.2019.e02134), 2019-07-25
Supplement: mmc1.pdf [file mmc1.pdf]

## APPENDIX A

**Cultural adaptation of the Russian version of the Pediatric Daytime Sleepiness Scale  
(PDSS)**

| Original English version                                        | Translation                                                                  | Back-translated version                                                   | Final Russian version                                                                            |
|-----------------------------------------------------------------|------------------------------------------------------------------------------|---------------------------------------------------------------------------|--------------------------------------------------------------------------------------------------|
| 1. How often do fall asleep or get drowsy during class periods? | Как часто вы засыпаете или чувствуете сонливость во время занятий?           | How often do you fall asleep or feel sleepy in class?                     | Как часто вы засыпаете или чувствуете сонливость во время занятий?                               |
| 2. How often do fall asleep or get drowsy during your homework? | Как часто вы засыпаете или чувствуете сонливость, выполняя домашнее задание? | How often do you fall asleep or feel sleepy when doing homework?          | Как часто вы засыпаете или чувствуете сонливость <u>во время выполнения**</u> домашнего задания? |
| 3*. Are you usually alert most of the day?                      | Чувствуете ли Вы себя обычно бодрым?                                         | Do you usually feel alert for most of the day?                            | <u>Бодры ли вы обычно большую часть дня**?</u>                                                   |
| 4. How often are you ever tired or grumpy during your day?      | Как часто Вы чувствуете себя уставшим и без настроения в течение дня?        | How often do you feel tired, irritable, and in a bad mood during the day? | Как часто Вы чувствуете себя уставшим и <u>раздражительным**</u> в течение дня?                  |
| 5. How often do you have trouble getting                        | Как часто Вы испытываете                                                     | How often do you find                                                     | Как часто Вы испытываете                                                                         |

|                                                                           |                                                                |                                                                   |                                                                        |
|---------------------------------------------------------------------------|----------------------------------------------------------------|-------------------------------------------------------------------|------------------------------------------------------------------------|
| out of bed in the morning?                                                | проблемы при пробуждении утром?                                | it difficult to wake up in the morning?                           | <u>трудности пробуждения по утрам**?</u>                               |
| 6. How often do you fell back to sleep after being awoken in the morning? | Как часто Вы снова засыпаете после пробуждения утром?          | How often do you fall back to sleep after waking up?              | Как часто Вы снова засыпаете <u>после того как проснетесь**</u> утром? |
| 7. How often do you need someone to awaken you in the morning?            | Как часто Вам нужна посторонняя помощь чтобы проснуться утром? | How often do you need help from others to wake up in the morning? | Как часто Вам нужна посторонняя помощь чтобы проснуться утром?         |
| 8. How often do think you need more sleep?                                | Как часто вы думаете что Вам нужно больше спать?               | How often do you think that you need more sleep?                  | Как часто вы думаете что Вам <u>не хватает сна**?</u>                  |

**\*This item has reverse score**

**\*\*Stressed words are changed in final version**
